# Supplementary material for: Role of Zerumbone, a Phytochemical Sesquiterpenoid from Zingiber zerumbet Smith, in Maintaining Macrophage Polarization and Redox Homeostasis
Source: MDPI journal article supplement (doi:10.3390/nu14245402), 2022-12-19
Supplement: s1 [file s1]

## Role of zerumbone in maintaining macrophage polarization and redox homeostasis

Wei-Lan Yeh, Bor-Ren Huang, Guan-Wei Chen, Vichuda Charoensaensuk, Liang-Yo Yang, Dah-

Yuu Lu, and Chingju Lin

### Supplementary Figure legends

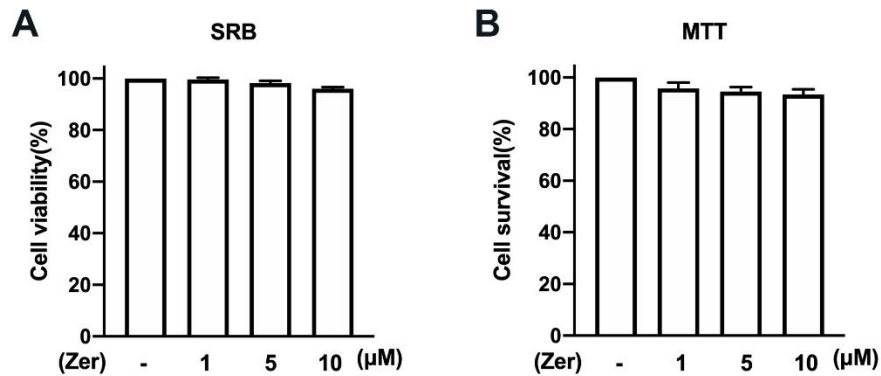

**Supplementary Figure S1. Effects of zerumbone on viability of macrophages.** RAW264.7 cells were incubated with various concentrations (1, 5, or 10  $\mu\text{M}$ ) of zerumbone for 24 h. Cell viability was then determined using the sulforhodamine B (SRB) (**A**) and 3-[4,5-dimethylthiazol-2-yl]-2,5 diphenyl tetrazolium bromide (MTT) (**B**) assays. The data represent the mean  $\pm$  SEM (n = 4).

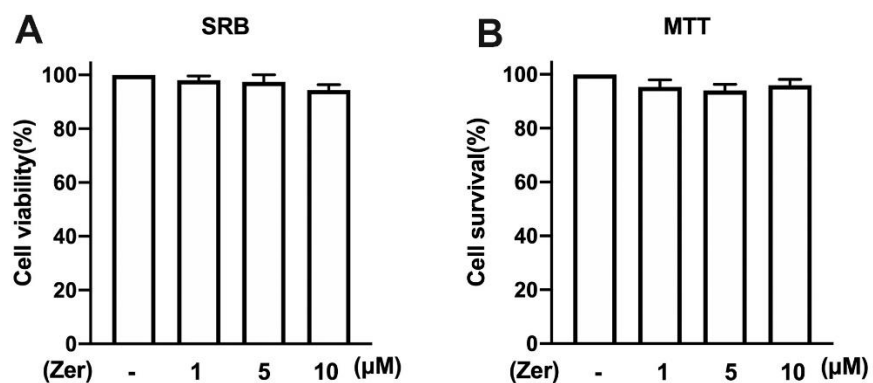

**Supplementary Figure S2. Effects of zerumbone on viability of microglia.** IMG cells were incubated with various concentrations (1, 5, or 10  $\mu$ M) of zerumbone for 24 h. Cell viability was then determined using SRB (**A**) and MTT (**B**) assays. The data represent the mean  $\pm$  SEM (n = 4).
